# Supplementary material for: Understanding species-specific and conserved RNA-protein interactions in vivo and in vitro
Source: PubMed Central journal article supplement — Nat Commun. 2024 Sep 27;15:8400. doi: 10.1038/s41467-024-52231-7 (PMC11436793; doi:10.1038/s41467-024-52231-7), 2024-09-27
Supplement: 41467_2024_52231_MOESM1_ESM.pdf [file 41467_2024_52231_MOESM1_ESM.pdf]

## Index of Supplementary Information for Harris *et al.*

### Supplementary Notes

### Supplementary Figures

- Supp. Figure 1 → relates to Figure 1: Design and validation of natural sequence RNA Bind-n-Seq
- Supp. Figure 2 → relates to Figure 2: Analysis of species-specific binding patterns
- Supp. Figure 3 → relates to Figure 3: Analysis of species-specific syntenic motif-level binding patterns
- Supp. Figure 4 → relates to Figure 4: Analysis of regional impacts on binding
- Supp. Figure 5 → relates to Figure 5: Evolutionary conservation of binding

### Supplementary Tables

- Supp. Table 1 → Primer sequences for cloning of recombinant UNK domains
- Supp. Table 2 → Primer sequences for RBNS reverse transcription and PCR
- Supp. Table 3 → Accession numbers for ENCODE RNA-seq data
- Supp. Table 4 → Accession numbers for ENCODE eCLIP data
- Supp. Table 5 → Sequences for synthetic UAG fluorescence polarization RNA oligos
- Supp. Table 6 → Sequences for synthetic *GTPB4* chimeras fluorescence polarization RNA oligos
- Supp. Table 7 → Final RNA sequences for qPCR binding assay
- Supp. Table 8 → qPCR primers used for qPCR binding assay

### Supplementary References

### Supplementary Download Items

- Supp. Data 1 → relates to Figure 1-4: nsRBNS data table used for all analyses with sequences, relevant iCLIP information, enrichment values, zscores, relevant sequence information, and relevant oligo information

- Supp. Data 2 → relates to Figure 5: 100vert RBNS data table used for all analyses with sequences, relevant species information, enrichment values, relevant sequence information, and relevant oligo information

## SUPPLEMENTARY NOTES

### Supp. Note 1

In our nsRBNS experiments, we have observed that human oligos are better bound than mouse oligos on a global scale. This can be observed for all oligos, bound alone, or unbound alone. The precise nature of these differences is difficult to define, however a few factors may contribute. While we can't be certain, one likely explanation might be in a technical challenge of performing iCLIP from mouse brain tissue vs human neuronal cell lines. It is plausible that the identified mouse binding sites were more challenging to derive due to tissue processing and crosslinking efficiencies as well as the abundance of UNK itself. These differences are apparent in some of our comparisons and limited our ability to test the impact of chimerizing mouse bound sequences into human not bound sequences to test if any enhanced UNK binding. Within these analyses, we found that while some regions from mouse bound sequences could enhance human binding, specific positions were not as impactful as we observed when chimerizing human into mouse (**Fig. 4B,C**). Generally, trends of binding patterns were overall weaker for mouse binding sites.

Another potential mechanism driving this is effect are inherent protein differences: Human recombinant protein was used for all *in vitro* experiments; however iCLIP was performed *in vivo* with species-specific proteins<sup>1</sup>. At the amino acid sequence level, human and mouse UNK are 95% identical and 96% similar overall while the RBDs are 99% identical<sup>2,3</sup>. Within the RBDs, only one amino acid is non-similar (Q321 in human, P321 in mouse). Structurally, this amino acid does not lie on the RNA-binding surface and likely does not directly contribute to RNA-protein interactions<sup>4</sup>. However, this single amino acid difference may affect global structural orientation, and therefore indirectly alter RNA-protein interactions *in vivo*. Indeed, previous work on transcription factors has demonstrated preferential binding of human sequences by human protein and vice versa<sup>5</sup>.

Cellular context differences: Individual RNA and protein concentrations vary across cell-types and species. Additionally, species-specific alternative splicing can result in sequence differences and isoform expression level changes across cell-types and species and have been largely correlated with genomic evolution<sup>6-9</sup>. These may be particularly important when comparing tissues to cell lines. Cell type mRNA composition and heterogeneity is likely an important consideration when assessing iCLIP from tissue samples. It is plausible that cell-type specific binding events within a tissue dampen the degree to which binding to any one site is detected. Previous work has demonstrated that RNA-protein interactions across tissue culture cells versus isolated tissue can vary drastically, even when similar cell types are considered<sup>10</sup>.

Since nsRBNS does not take into consideration any competitive binding, cofactors, salt concentrations, diffusion differences, etc. between cells and purely measures RNA-protein interactions, these factors may be different across species, even when similar cell types are examined.

## **Supp. Note 2**

In our 100vert RBNS experiment, we observe a decreased range of enrichments (-3 to 3 on log<sub>2</sub> scale) versus nsRBNS (-6 to 6 on log<sub>2</sub> scale). RBNS is inherently a zero-sum experiment (aka gain must equal loss). While both nsRBNS and 100vert RBNS are impacted by the nature of these experiments, oligo design for 100vert RBNS led to a greater impact (*i.e.*, dampening of signal).

For comparison, in nsRBNS only ~5,000 (20%) out of ~25,000 oligos were predicted to bind, whereas ~7,000 (28%) had unknown binding capabilities, while the remaining ~13,000 (52%) were expected to be non-binders. While non-binders were primarily included as controls and for validation purposes, this allowed for less competition within the oligo pool, and therefore a larger separation of enrichment values.

In contrast, only ~10% of expected non-binders were included for 100vert RBNS. Further, 100vert RBNS was designed from the top bound oligos in nsRBNS, further narrowing expected binding differences across oligos. This prevalence of high-capacity binders led to an earlier saturation of UNK protein with high competition potential between the oligos. The increased competition dampened the overall signal of the experiment, resulting in a decreased range of enrichments measured.









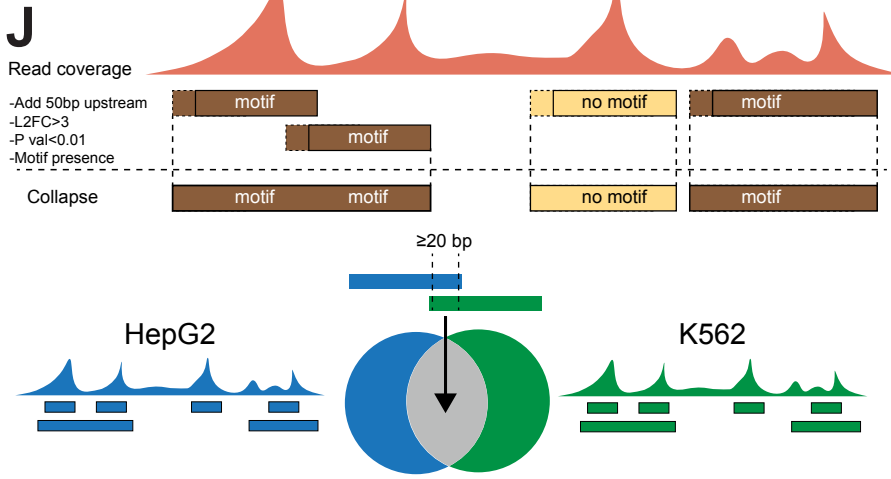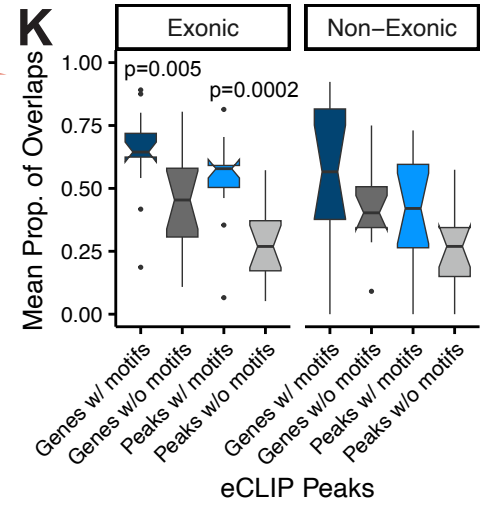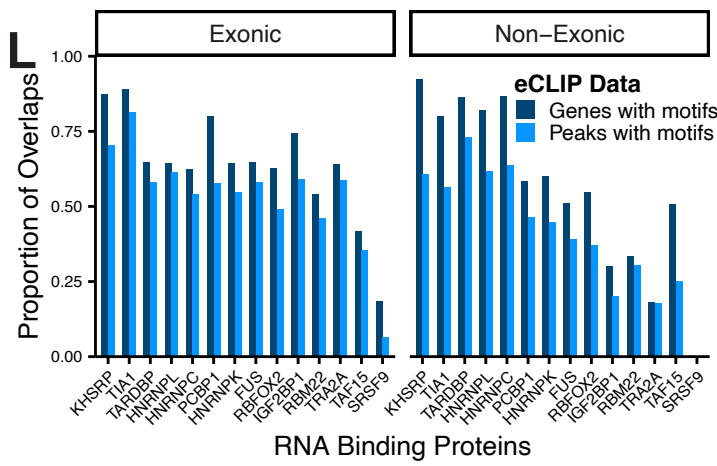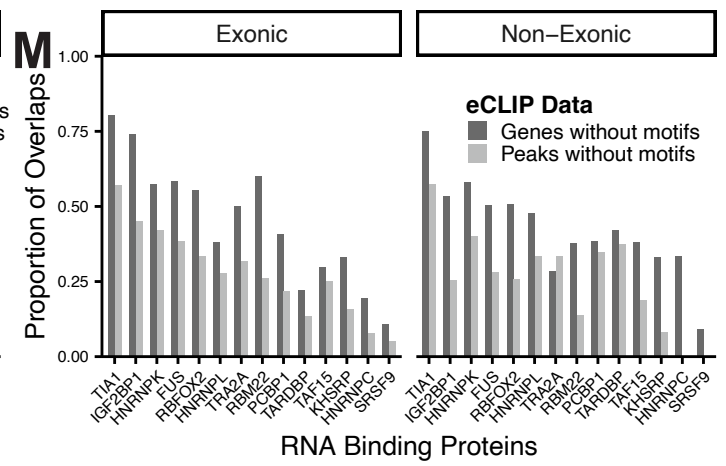

# Supplemental Figure 4

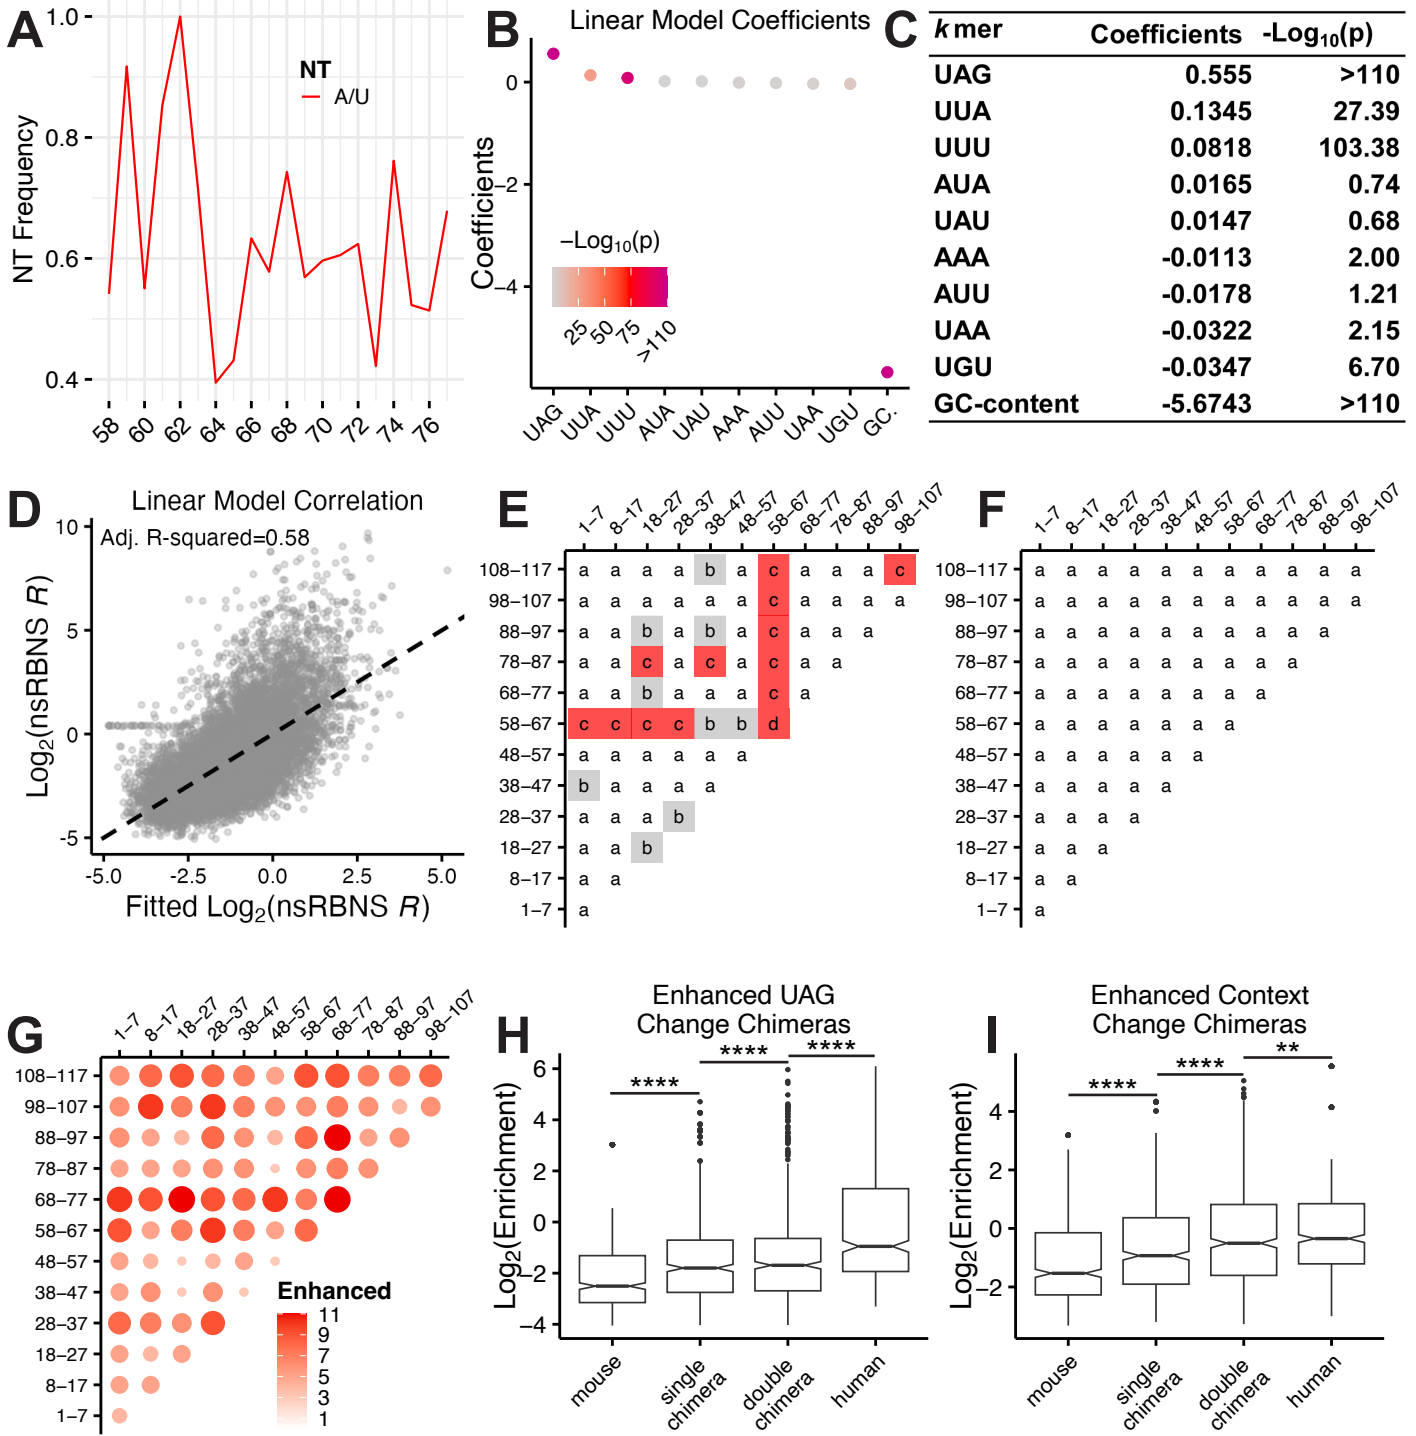

# Supplemental Figure 5

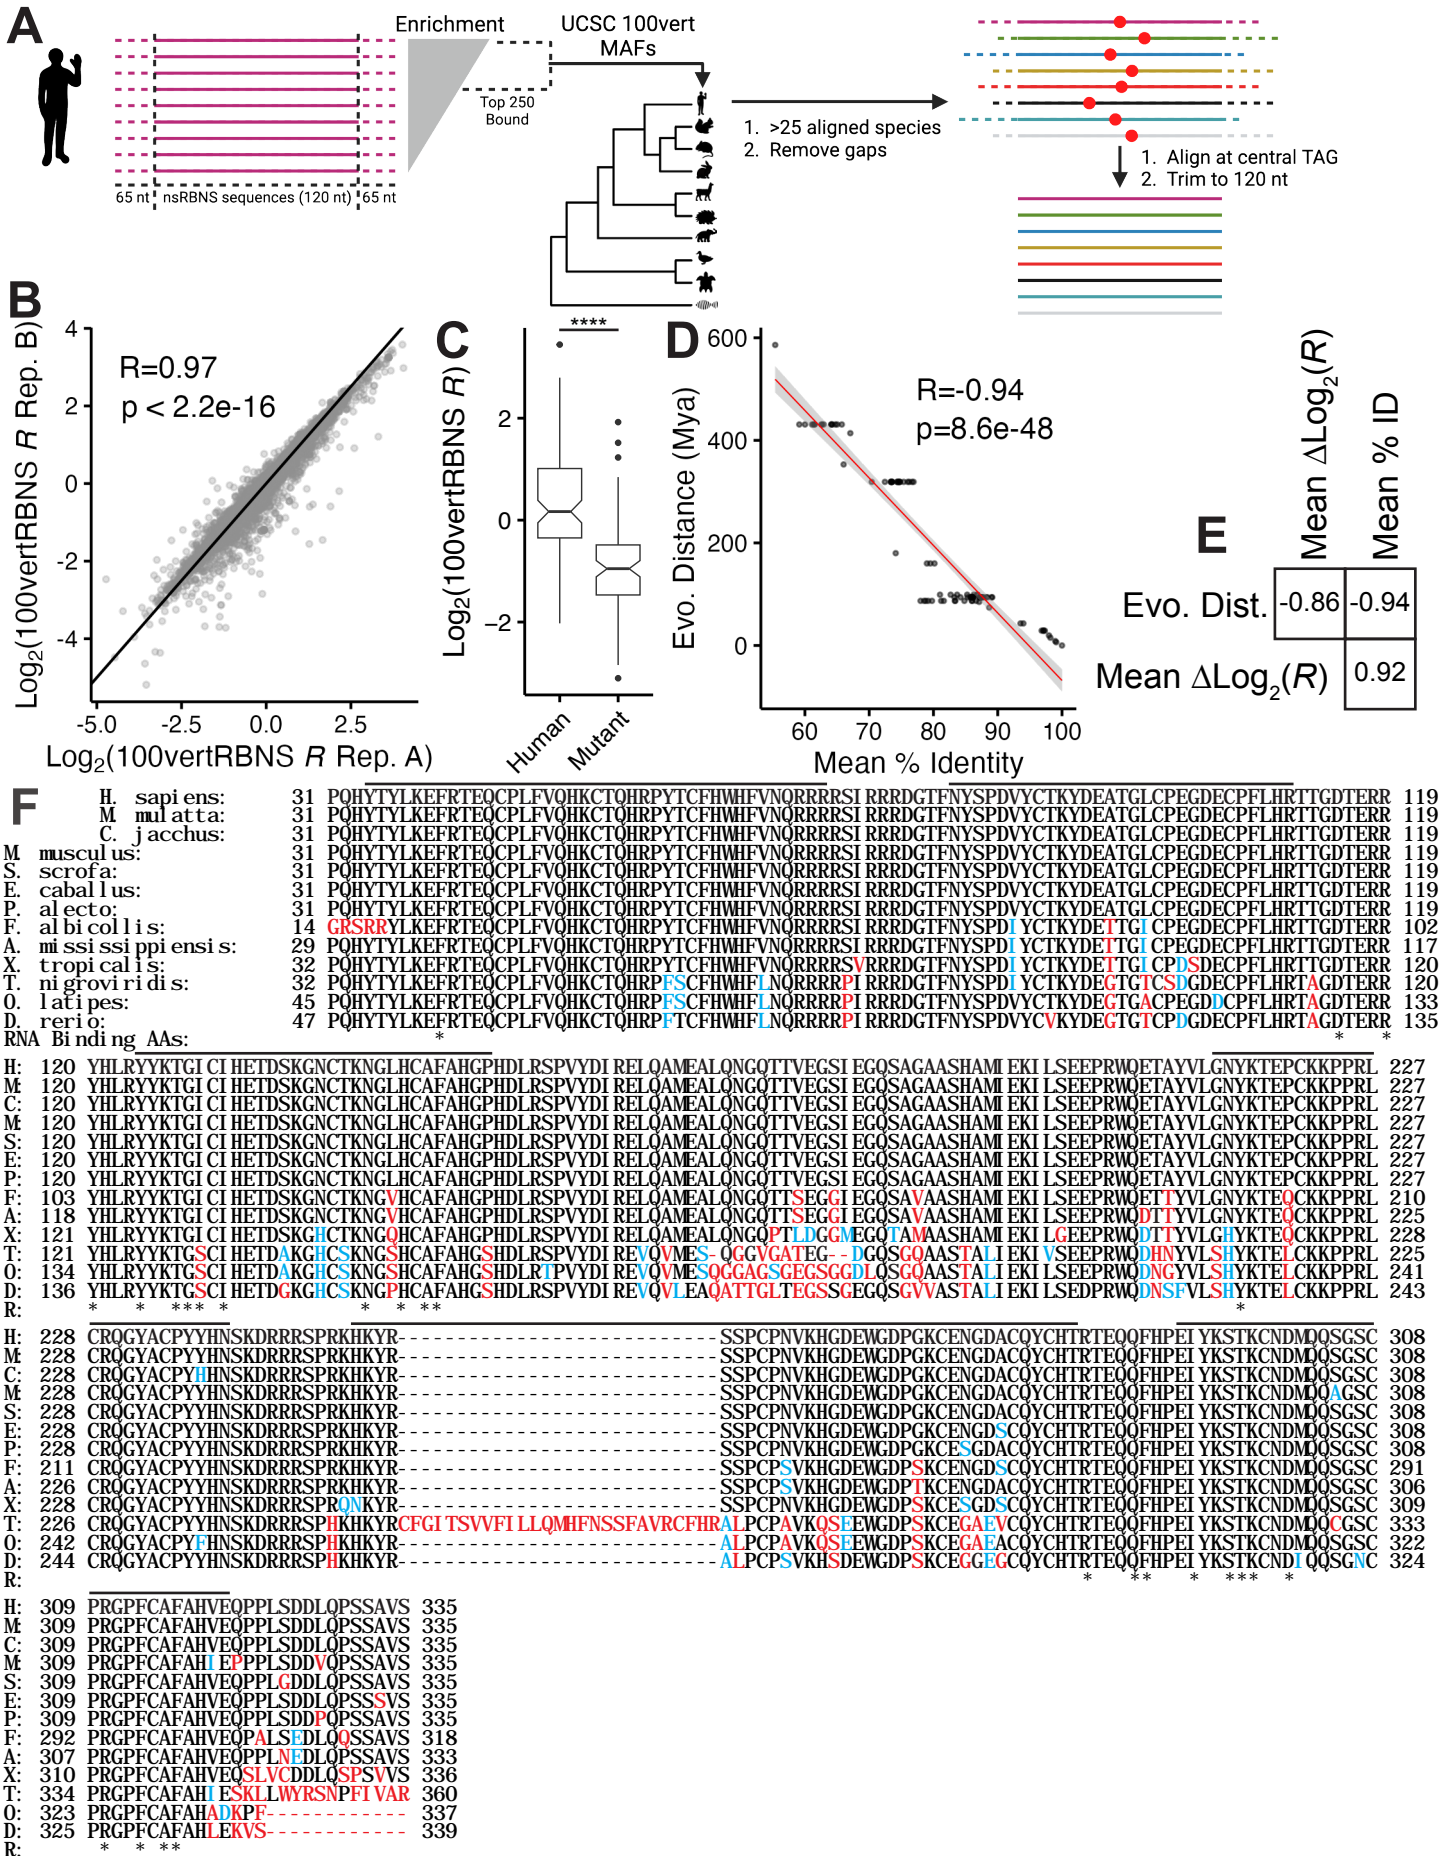

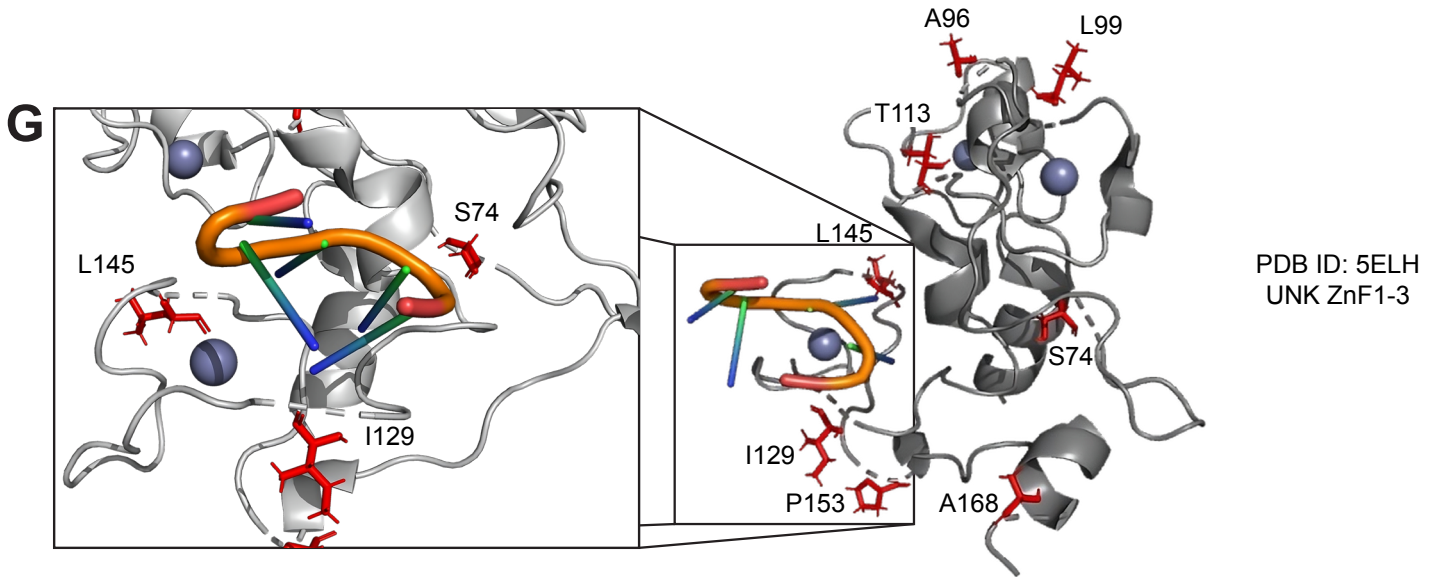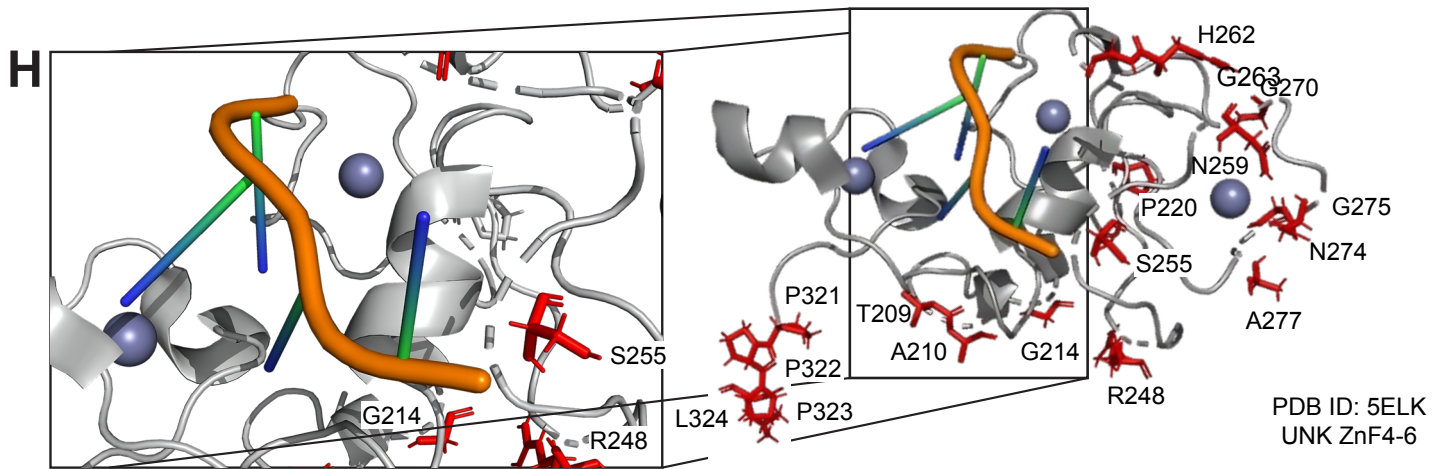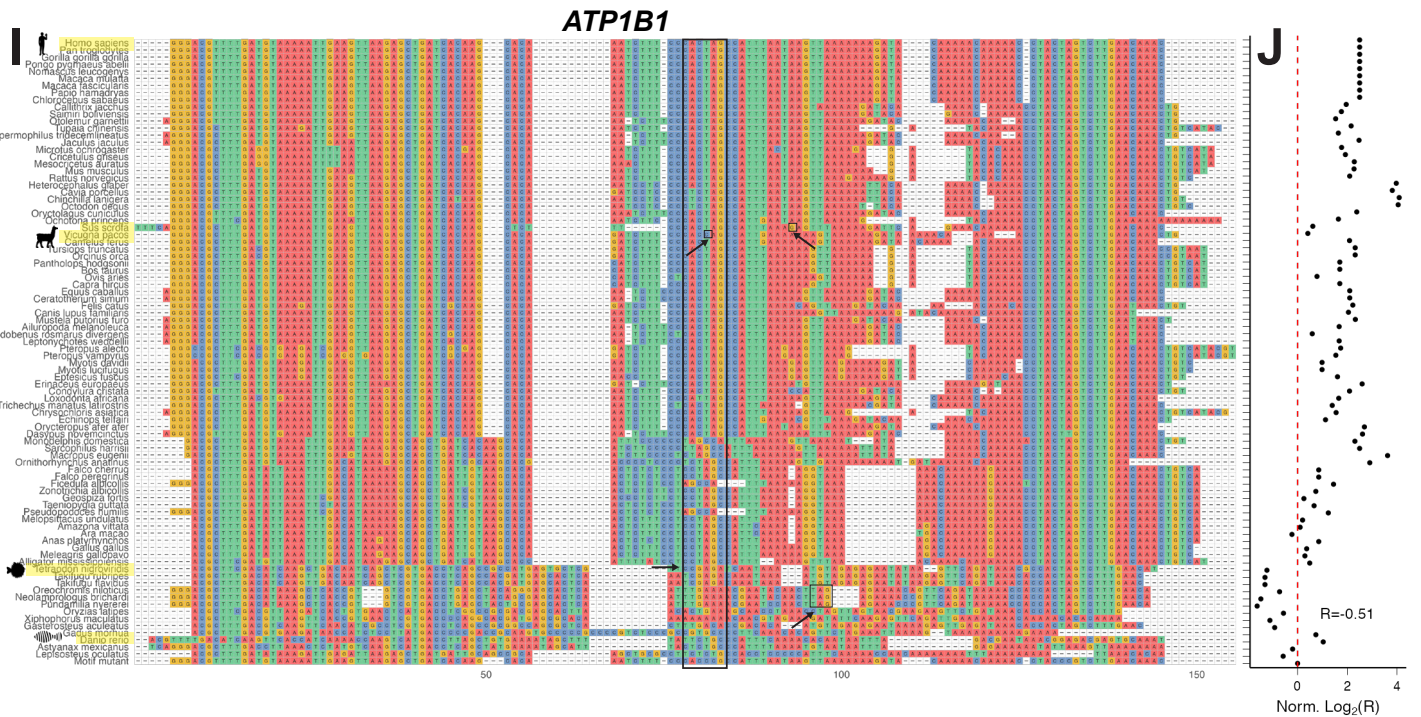

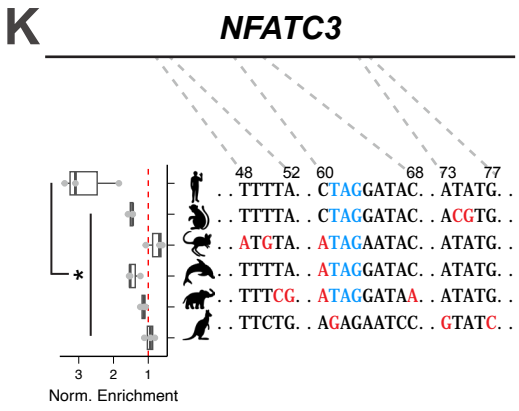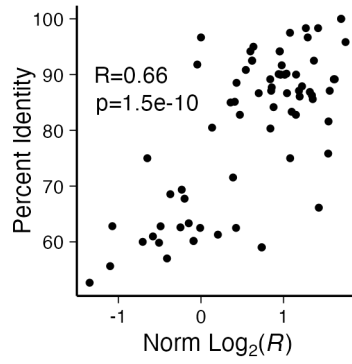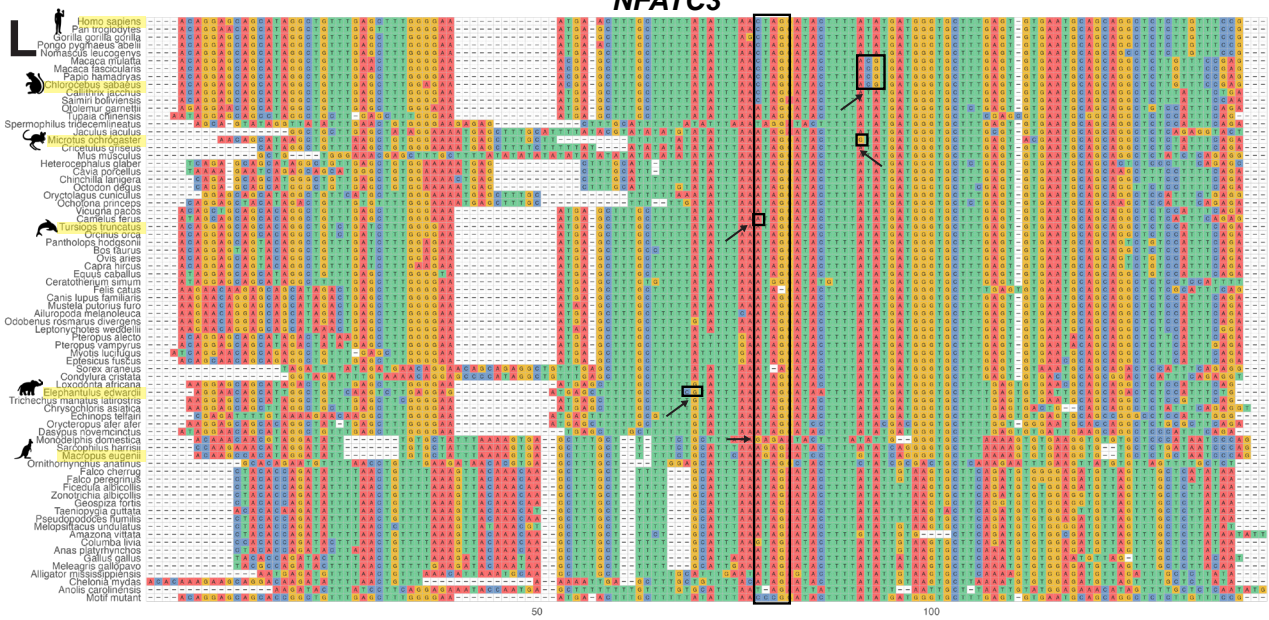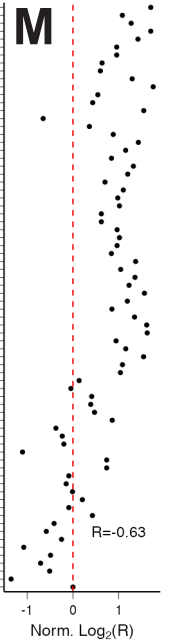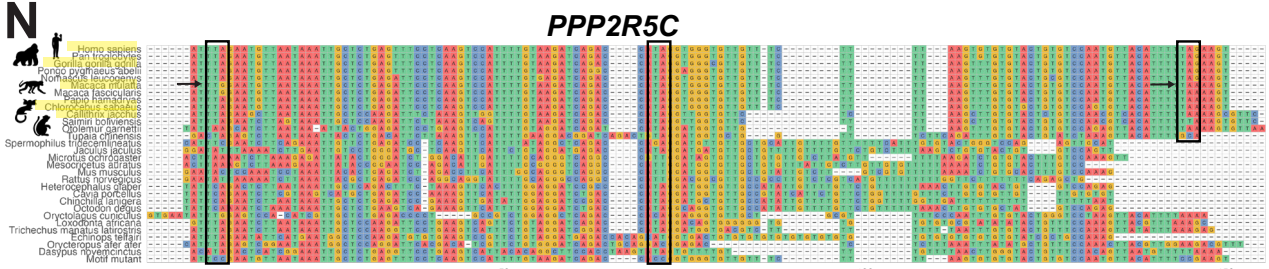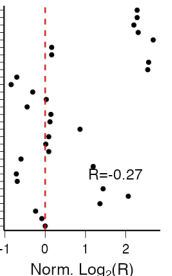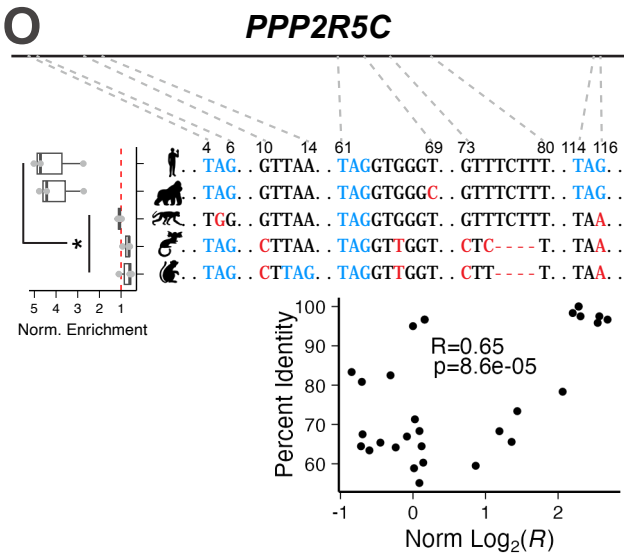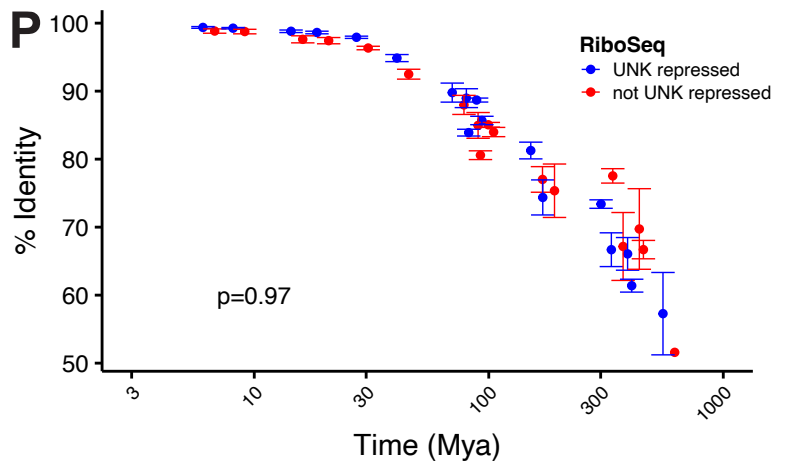

## SUPPLEMENTARY LEGENDS

**Supp. Fig. 1. Design and validation of natural sequence RNA Bind-n-Seq.** A) Diagram of iCLIP peak overlap analysis method between human neuronal cells (SH-SY5Y) and mouse brain tissue or human HeLa cells. B) Design and motif logos of RBNS with ZnF1-3 and ZnF4-6. C-D) Cumulative distribution function of  $\log_2$  nsRBNS enrichment of all oligos separated by C) UUU and D) UUA motif content. Insets show significance values for all comparisons via KS test and corrected for multiple comparisons via the BH procedure. Red denotes significant ( $p \leq 0.05$ ). Values are as follows: e ( $p \leq 0.001$ ), f ( $p \leq 0.0001$ ). E) *in vitro* qPCR fraction bound for wild type and mutant *GART* RNA oligos incubated with UNK at 167 and 1500 nM. Significance was determined via one-sided Wilcox test ( $p \leq 0.01$ ;  $n=5$  technical replicates). Error bars represent SEM. F) Box and whisker plot of  $\log_2$  nsRBNS enrichment of all oligos separated by quantile-binned mean base pair probability (BPP) of the central region (54-64). Significance determined via KS test and corrected for multiple corrections via the BH procedure. All comparisons to lowest bin are significant ( $p \leq 0.0001$ ). Centre line denotes median (50th percentile) with bounds of box representing 25th to 75th percentiles and the whiskers denoting 5th to 95th percentiles. Outliers are denoted as individual points.

**Supp. Fig. 2. Analysis of species-specific binding patterns.** A) Scatter plot of the  $\log_2$  *kmer* frequency fold change (UTR/CDS) of the top and bottom ten 3mers of all (left) motif-upstream (center) whole sequence and (right) motif-downstream sequences colored by UNK bound *kmer* as identified via RBNS<sup>11</sup>. B-C) Density plot of *in vivo* binding versus *in vitro* binding patterns for “motif mutant” and “orthologous” oligos versus *in vivo* bound oligos for B) CDS and C) UTR oligos. D-E) Bar plot of *in vivo* binding versus *in vitro* binding patterns for “motif mutant” and “orthologous” oligos versus D) human and E) mouse *in vivo* bound oligos. “Mirrors” correlation defined as  $\geq 2$ -fold change of *in vivo* bound over *in vivo* unbound, “weak mirrors” defined as  $< 2$  and  $\geq 1$ -fold change, “weak opposite” defined as  $< 1$  and  $> 0.5$  fold change, and “opposite” defined as  $\leq 0.5$

fold change. F-G) Cumulative distribution function of  $\log_2$  fold nsRBNS enrichment change of *in vivo* bound over *in vivo* not bound oligos separated by F)  $\Delta$ UUU and G)  $\Delta$ UUA content. Insets show significance values for all comparisons via KS test and corrected for multiple comparisons via the BH procedure. Red denotes significant ( $p \leq 0.05$ ). Values are as follows: a (ns), b ( $p \leq 0.1$ ), c ( $p \leq 0.05$ ), d, ( $p \leq 0.01$ ), e ( $p \leq 0.001$ ), f ( $p \leq 0.0001$ ). H-I) Cumulative distribution function of  $\log_2$  fold nsRBNS enrichment change of *in vivo* bound over *in vivo* not bound oligos separated by percent conservation for H) all and I) kmer loss cross-species comparisons. Insets show significance values for all comparisons via KS test and corrected for multiple comparisons via the BH procedure. Red denotes significant ( $p \leq 0.05$ ). Values are as follows: a (ns), b ( $p \leq 0.1$ ), c ( $p \leq 0.05$ ), d, ( $p \leq 0.01$ ), f ( $p \leq 0.0001$ ).

**Supp. Fig 3. Analysis of species-specific syntenic motif level binding patterns.** A-B) Cumulative distribution function of  $\log_2$  nsRBNS enrichment of control (light grey; dotted), not bound (teal), bound elsewhere (purple), binding conserved (blue), and perfectly conserved (orange) for A) all UTR and B) motif conserved UTR oligos. Insets show significance values for all comparisons via KS test and corrected for multiple comparisons via the BH procedure. Red denotes significant ( $p \leq 0.05$ ), and gray denotes nearing significant ( $p \leq 0.1$ ). Values are as follows: a (ns), b ( $p \leq 0.1$ ), c ( $p \leq 0.05$ ), e ( $p \leq 0.001$ ), f ( $p \leq 0.0001$ ). C) Cumulative distribution function of  $\log_2$  fold nsRBNS enrichment change (parent/ortholog) of “binding conserved” oligos pairs separated by percent conservation. Inset shows significance values for all comparisons via KS test and corrected for multiple comparisons via the BH procedure. Red denotes significant ( $p \leq 0.05$ ). Values are as follows: a (ns), b ( $p \leq 0.1$ ), d ( $p \leq 0.01$ ). D) Boxplot of percent conservation of binding conserved, not bound, and bound elsewhere oligo pairs where the parent was bound in human, but the aligned orthologous region was unbound. Significance was determined via KS tests and corrected for multiple comparisons via the BH procedure. Statistical marks are as follows: \*\*\* —  $p \leq 0.001$ , \*\*\*\* —  $p \leq 0.0001$ . Centre line denotes median (50th percentile) with bounds of box

representing 25th to 75th percentiles and the whiskers denoting 5th to 95th percentiles. Outliers are denoted as individual points. E) Heat map of 3mer human over mouse enrichment upstream and downstream of central UAG in orthologs bound better in humans. F) Delta fluorescence polarization binding curves (n=3 technical replicates) for UNK ZnF1-6 (green circle), ZnF1-3 (blue triangle), and ZnF4-6 (teal square) incubated with a tri-UAG-containing RNA oligo graphed with delta fluorescence polarization binding curves for UNK ZnF1-6 (hollow green circle) incubated with a mono-UAG-containing RNA oligo. Each curve was normalized to its minimum and maximum fluorescence polarization signal to produce delta fluorescence polarization values. Data are presented as mean values +/- SD. G) Transcript level conservation of iCLIP UNK hits between human neuronal cells (SH-SY5Y) and human epithelial cells (HeLa). Significance determined via hypergeometric test. H) Motif level conservation of iCLIP UNK hits between human neuronal cells (SH-SY5Y) and human epithelial cells (HeLa). I) Cumulative distribution function of  $\log_2$  nsRBNS enrichment of human not bound *in vivo* (light grey; dotted), SH-SY5Y-specific oligos (purple), and SH-SY5Y and HeLa shared oligos (blue) Inset shows significance values for all comparisons via KS test and corrected for multiple comparisons via the BH procedure. Red denotes significant ( $p \leq 0.05$ ). Values are as follows: a (ns), b ( $p \leq 0.1$ ), d, ( $p \leq 0.01$ ). J) Diagram of eCLIP peak overlap analysis between HepG2 and K562 data. K) Mean proportion of overlaps of bound eCLIP genes and peaks between available HepG2 and K562 data<sup>12</sup> for 14 RBPs with and without known motifs from RBNS<sup>11</sup>. Data split into exonic and non-exonic peaks (see **Methods**). Significance determined via KS tests. Centre line denotes median (50th percentile) with bounds of box representing 25th to 75th percentiles and the whiskers denoting 5th to 95th percentiles. Outliers are denoted as individual points. L) Overlap of bound eCLIP genes and peaks between available HepG2 and K562 data<sup>12</sup> for 14 RBPs with known motifs from RBNS<sup>11</sup>. Data split into exonic and non-exonic peaks (see **Methods**). M) Overlap of bound eCLIP genes and peaks between available HepG2 and K562 data<sup>12</sup> for 14 RBPs without known motifs from RBNS<sup>11</sup>. Data split into exonic and non-exonic peaks (see **Methods**).



**Supp. Fig. 4. Analysis of regional impacts on binding.** A) A/U nucleotide frequency of the central region (pos58-77) of enriched “Context Change” chimeras. B-D) Linear modeling of all natural (non-mutated, non-chimeric) sequences. B) Plot of linear model coefficients for top UNK motifs as defined by RBNS<sup>11</sup>, colored by  $-\log_{10} p$ . C) Table of linear model coefficients and  $-\log_{10} p$  for top UNK motifs. D) Correlation of fitted  $\log_2$  nsRBNS enrichment via linear model versus observed  $\log_2$  nsRBNS enrichment. E-F) Heat map of significance values ( $p$ ) for all single and double E) “UAG Change” and F) “Context Change” chimeras with significant binding changes ( $p \leq 0.05$ , red) and nearing significant ( $p \leq 0.1$ , grey). Values are as follows: a (ns), b ( $p \leq 0.1$ ), c ( $p \leq 0.05$ ), d ( $p \leq 0.01$ ), e ( $p \leq 0.001$ ), f ( $p \leq 0.0001$ ). Significance was determined via paired, one-sided Wilcoxon test and corrected for multiple comparisons via the BH procedure. G) Heat map of number of “Context Change” double chimeras enhanced upon chimerization. H-I) Box and whisker plot of  $\log_2$  enrichment of mouse, single chimera, double chimera, and human oligos where both the single and double chimeras showed improved binding over mouse for H) “UAG Change” and I) “Context Change” chimeras. Significance was determined via paired, one-sample, Wilcoxon test. Statistical marks are as follows: \*\* —  $p \leq 0.01$ , \*\*\*\* —  $p \leq 0.0001$ . Centre line denotes median (50th percentile) with bounds of box representing 25th to 75th percentiles and the whiskers denoting 5th to 95th percentiles. Outliers are denoted as individual points.

**Supp. Fig. 5. Evolutionary Conservation of Binding.** A) Design of 100 vertebrate DNA pool. B) Correlation plot of two experimental 100 vertebrate nsRBNS replicates. Pearson’s correlation coefficient included. C) Box and whisker plot of  $\log_2$  100vertRBNS enrichment for human and total motif mutants. Significance was determined via paired, one-sided Wilcoxon test. Statistical marks are as follows: \*\*\*\* —  $p \leq 0.0001$ . Centre line denotes median (50th percentile) with bounds of box representing 25th to 75th percentiles and the whiskers denoting 5th to 95th percentiles. Outliers are denoted as individual points. D) Evolutionary distance in millions of years (Y-axis)

versus mean percent RNA sequence identity (X-axis) for each aligned oligo. Pearson's correlation coefficient included. E) Full correlation of evolutionary distance in millions of years, mean percent RNA sequence identity, and mean delta  $\log_2$  100vertRBNS enrichment. F) Multiple sequence alignment of the RNA-binding domains of UNK across select vertebrates. Individual ZnF domains are highlighted via black bar. Blue denotes similar amino acids while red denotes non-similar sequence divergence as predicted by BLAST. Asterisks denote direct RNA-contacting residues as predicted based on Murn *et al.*, 2016<sup>4</sup> G) Structure of UNK ZnF1-3 from Murn *et al.*, 2016<sup>4</sup> with less stringently conserved residues highlighted in red. Note: only I129 is predicted to have direct RNA contacts based on the crystal structure. H) Structure of UNK ZnF4-6 from Murn *et al.*, 2016<sup>4</sup> with less stringently conserved residues highlighted in red. Note: no evolving residues are predicted to have direct RNA contacts based on the crystal structure. I) Full multiple sequence alignment for *ATP1B1*. Related to figure 5E. J) Normalized  $\log_2$  100vertRBNS enrichment of *ATP1B1*. Pearson's correlation coefficient included. K) (left) Multiple sequence alignment for *NFATC3* for *Homo sapiens*, *Chlorocebus sabaeus*, *Jaculus jaculus*, *Tursiops truncatus*, *Elephantulus edwardii*, and *Macropus eugenii* with normalized 100vertRBNS enrichment by species (n=3 technical replicates). Centre line denotes median (50th percentile) with bounds of box representing 25th to 75th percentiles and the whiskers denoting 5th to 95th percentiles. All data included as individual points. Significance determined via one-sided Wilcox tests. (right) Percent RNA sequence identity (Y-axis) versus normalized delta  $\log_2$  nsRBNS enrichment (X-axis). Pearson's correlation coefficient included. L) Full multiple sequence alignment for *NFATC3*. M) Normalized  $\log_2$  100vertRBNS enrichment of *NFATC3*. Pearson's correlation coefficient included. N) (left) Multiple sequence alignment for *PPP2R5C*. (right) Normalized  $\log_2$  100vertRBNS enrichment of *PPP2R5C*. Pearson's correlation coefficient included. O) (top) Multiple sequence alignment for *PPP2R5C* for *Homo sapiens*, *Gorilla gorilla gorilla*, *Macaca mulatta*, *Callithrix jacchus*, and *Saimiri boliviensis* with normalized 100vertRBNS enrichment by species (n=3 technical replicates). Centre line denotes median (50th percentile) with bounds of

box representing 25th to 75th percentiles and the whiskers denoting 5th to 95th percentiles. All data included as individual points. Significance determined via one-sided Wilcoxon tests. (bottom) Percent RNA sequence identity (Y-axis) versus normalized delta  $\log_2$  100vertRBNS enrichment (X-axis). Pearson's correlation coefficient included. P) Plot of percent identity by evolutionary distance, X-axis plotted on  $\log_{10}$  scale. Error bars show SEM. Data was separated by regulation as determined via RiboSeq where blue is higher than average  $\log_2$  fold change ( $>-0.9$ ) and red is less than average  $\log_2$  fold change ( $<-0.9$ ). Significance was determined via KS test. Data are presented as mean values  $\pm$  SD.

## SUPPLEMENTARY TABLES

**Supp. Table 1. Primer sequences for cloning of recombinant UNK domains**

| Primer name                            | Sequence                         |
|----------------------------------------|----------------------------------|
| pGEX-GST-SBP-UNK ZnF1-3 forward primer | GCGTGAACCGGGATCCCCGCAGCACTACACGT |
| pGEX-GST-SBP-UNK ZnF1-3 reverse primer | ACGATGCGGCCGCTCAATTCTGCAAGGCCTCC |
| pGEX-GST-SBP-UNK ZnF4-6 forward primer | GCGTGAACCGGGATCCCCTCGGTGGCAAGAGA |
| pGEX-GST-SBP-UNK ZnF4-6 reverse primer | ACGATGCGGCCGCTCAGGACACAGCTGAGGAA |

**Supp. Table 2. Primer sequences for RBNS reverse transcription and PCR**

| Primer name         | Sequence                                                                           |
|---------------------|------------------------------------------------------------------------------------|
| nsRBNS RT primer    | TCCTTGGCACCCGAGAATTCCANNNNNNNTGATGCTCAATCCTCTGTTG                                  |
| RBNS index primer   | CAAGCAGAAGACGGCATAACGAGAT[N <sub>6</sub> barcode]GTGACTGGAGTTCCTTGGCACCCGAGAATTCCA |
| RBNS reverse primer | AATGATACGGCGACCACCGAGATCTACACGTTTCAGAGTTCTACAGTCCGA                                |

**Supp. Table 3. Accession numbers for ENCODE RNA-seq data**

| Encode ID               | Cell line | Rep |
|-------------------------|-----------|-----|
| ENCFF267RKD,ENCFF455VYN | K562      | 1   |
| ENCFF606ZTR,ENCFF444KCV | K562      | 2   |
| ENCFF713MNU,ENCFF478DZZ | HepG2     | 1   |
| ENCFF936SLY,ENCFF446UEC | HepG2     | 2   |

**Supp. Table 4. Accession numbers for ENCODE eCLIP data**

| Encode ID   | RBP Target | Cell Line |
|-------------|------------|-----------|
| ENCFF073PCD | HNRNPL     | HepG2     |
| ENCFF077OSY | HNRNPL     | K562      |
| ENCFF082QGS | RBFox2     | HepG2     |
| ENCFF103PRM | HNRNPL     | HepG2     |
| ENCFF105GZJ | TRA2A      | HepG2     |
| ENCFF121XCN | PCBP1      | K562      |
| ENCFF127WMZ | KHSRP      | K562      |
| ENCFF145YYK | IGF2BP1    | HepG2     |
| ENCFF150ZOO | RBM22      | K562      |
| ENCFF185IDD | IGF2BP1    | K562      |
| ENCFF230QOU | HNRNPC     | HepG2     |
| ENCFF241AOZ | HNRNPK     | K562      |

|             |         |       |
|-------------|---------|-------|
| ENCFF253ZSN | RBM22   | HepG2 |
| ENCFF288MWL | HNRNPK  | HepG2 |
| ENCFF327JJE | SRSF9   | HepG2 |
| ENCFF348TPU | TIA1    | K562  |
| ENCFF374XQF | KHSRP   | K562  |
| ENCFF378HWC | TIA1    | HepG2 |
| ENCFF383ZAQ | TAF15   | HepG2 |
| ENCFF390PJW | RBFOX2  | HepG2 |
| ENCFF401YRZ | HNRNPL  | K562  |
| ENCFF402AIE | TRA2A   | K562  |
| ENCFF409DPS | TAF15   | K562  |
| ENCFF421FJD | TARDBP  | HepG2 |
| ENCFF432ASF | SRSF9   | HepG2 |
| ENCFF443KJS | FUS     | K562  |
| ENCFF502OYV | PCBP1   | HepG2 |
| ENCFF526OQL | HNRNPC  | K562  |
| ENCFF534YQS | HNRNPC  | HepG2 |
| ENCFF545NBF | RBM22   | HepG2 |
| ENCFF565ILV | FUS     | K562  |
| ENCFF606RXB | TARDBP  | K562  |
| ENCFF611AHG | KHSRP   | HepG2 |
| ENCFF613UUR | SRSF9   | K562  |
| ENCFF618ZPP | TRA2A   | K562  |
| ENCFF626XAA | TARDBP  | HepG2 |
| ENCFF664RLU | HNRNPC  | K562  |
| ENCFF669TNM | TARDBP  | K562  |
| ENCFF674TKN | TIA1    | K562  |
| ENCFF685MZA | FUS     | HepG2 |
| ENCFF705SDK | IGF2BP1 | HepG2 |
| ENCFF754XAQ | HNRNPK  | HepG2 |
| ENCFF766DUS | PCBP1   | K562  |
| ENCFF779OIO | RBFOX2  | K562  |
| ENCFF824IDO | HNRNPK  | K562  |
| ENCFF853FGC | IGF2BP1 | K562  |
| ENCFF856EHA | TIA1    | HepG2 |
| ENCFF860QZG | SRSF9   | K562  |
| ENCFF899HGF | RBM22   | K562  |
| ENCFF899ZEH | TAF15   | HepG2 |
| ENCFF910WLP | RBFOX2  | K562  |
| ENCFF914VUW | PCBP1   | HepG2 |
| ENCFF951IBI | FUS     | HepG2 |
| ENCFF966KQG | TRA2A   | HepG2 |
| ENCFF988MWD | KHSRP   | HepG2 |
| ENCFF996BXS | TAF15   | K562  |

**Supp. Table 5. Sequences for synthetic UAG fluorescence polarization RNA oligos**

| Oligo name | Sequence |
|------------|----------|
|------------|----------|

|                 |                            |
|-----------------|----------------------------|
| Mono-UAG FP RNA | AAAAAAAAUUAGAAAAAA /6-FAM/ |
| Tri-UAG FP RNA  | UAGUUUAGUUUAGUU /6-FAM/    |

**Supp. Table 6. Sequences for synthetic *GTPB4* chimeras fluorescence polarization RNA oligos**

| Oligo name                   | Sequence                     |
|------------------------------|------------------------------|
| Human <i>GTPB4</i> FP RNA    | UACAUCGCAUUAGACAUUUU /6-FAM/ |
| Mouse <i>gtpb4</i> FP RNA    | UUCAUCGGAUUCGACAUUUU /6-FAM/ |
| Chi58-67 <i>gtpb4</i> FP RNA | UUCAUCGCAUUAGACAUUUU /6-FAM/ |

**Supp. Table 7. Final RNA sequences for qPCR binding assay**

| Oligo name      | Sequence                                                                                                                                                                      |
|-----------------|-------------------------------------------------------------------------------------------------------------------------------------------------------------------------------|
| WT GART RNA     | GAGUUCUACAGUCCGACGAUCGUUAUCUCCAACAAAGCCGC<br>AGUAGCUGGGUUAGAUAAAGCGGAAAGAGCUGGUUUAUCCCA<br>CUAGAGUAAUUAUCAUAAACUGUAUAAAAAUCGUGUAGAAU<br>UUGACAGUGCAAUUGACCAACAGAGGAUUGAGCAUCA |
| Mutant GART RNA | GAGUUCUACAGUCCGACGAUCGUUAUCUCCAACAAAGCCGC<br>AGUAGCUGGGUUAGAUAAAGCGGAAAGAGCUGGUUUAUCCCA<br>CCCGAGUAAUUAUCAUAAACUGUAUAAAAAUCGUGUAGAAU<br>UUGACAGUGCAAUUGACCAACAGAGGAUUGAGCAUCA |

**Supp. Table 8. qPCR primers used for qPCR binding assay**

| Primer name | Sequence              |
|-------------|-----------------------|
| qPCR_FWD    | GAGTTCTACAGTCCGACGATC |
| qPCR_REV    | TGATGCTCAATCCTCTGTTG  |

## SUPPLEMENTARY REFERENCES

1. Murn, J. *et al.* Control of a neuronal morphology program by an RNA-binding zinc finger protein, Unkempt. *Genes Dev* **29**, 501–512 (2015).
2. UniProt. UniProt: the Universal Protein knowledgebase in 2023. *Nucleic Acids Res* **51**, D523–D531 (2023).
3. Altschul, S. F., Gish, W., Miller, W., Myers, E. W. & Lipman, D. J. Basic local alignment search tool. *J Mol Biol* **215**, 403–410 (1990).
4. Murn, J., Teplova, M., Zarnack, K., Shi, Y. & Patel, D. J. Recognition of distinct RNA motifs by the clustered CCCH zinc fingers of neuronal protein Unkempt. *Nat Struct Mol Biol* **23**, 16–23 (2016).
5. Wilson, M. D. *et al.* Species-specific transcription in mice carrying human chromosome 21. *Science* (1979) **322**, 434–438 (2008).
6. Merkin, J., Russell, C., Chen, P. & Burge, C. B. Evolutionary dynamics of gene and isoform regulation in Mammalian tissues. *Science* (1979) **338**, 1593–1599 (2012).
7. Barbosa-Morais, N. L. *et al.* The evolutionary landscape of alternative splicing in vertebrate species. *Science* (1979) **338**, 1587–1593 (2012).
8. Barr, K. A., Rhodes, K. L. & Gilad, Y. The relationship between regulatory changes in cis and trans and the evolution of gene expression in humans and chimpanzees. *Genome Biol* **24**, 1–21 (2023).
9. Sudmant, P. H., Alexis, M. S. & Burge, C. B. Meta-analysis of RNA-seq expression data across species, tissues and studies. *Genome Biol* **16**, 1–11 (2015).
10. Perez-Perri, J. I. *et al.* The RNA-binding protein landscapes differ between mammalian organs and cultured cells. *Nat Commun* **14**, 2074 (2023).
11. Dominguez, D. *et al.* Sequence, structure, and context preferences of human RNA binding proteins. *Mol Cell* **70**, 854–867 (2018).

12. Van Nostrand, E. L. *et al.* A large-scale binding and functional map of human RNA-binding proteins. *Nature* **583**, 711–719 (2020).
