# Supplementary material for: Understanding species-specific and conserved RNA-protein interactions in vivo and in vitro
Source: PubMed Central journal article supplement — Nat Commun. 2024 Sep 27;15:8400. doi: 10.1038/s41467-024-52231-7 (PMC11436793; doi:10.1038/s41467-024-52231-7), 2024-09-27
Supplement: 41467_2024_52231_MOESM3_ESM.pdf [file 41467_2024_52231_MOESM3_ESM.pdf]

## **Description of Additional Supplementary Files**

File Name: Supplementary Data 1

Description: relates to Figure 1-4: nsRBNS data table used for all analyses with sequences, relevant iCLIP information, enrichment values, zscores, relevant sequence information, and relevant oligo information

File Name: Supplementary Data 2

Description: relates to Figure 5: 100vert RBNS data table used for all analyses with sequences, relevant species information, enrichment values, relevant sequence information, and relevant oligo information
