# Supplementary material for: Understanding species-specific and conserved RNA-protein interactions in vivo and in vitro
Source: PubMed Central journal article supplement — Nat Commun. 2024 Sep 27;15:8400. doi: 10.1038/s41467-024-52231-7 (PMC11436793; doi:10.1038/s41467-024-52231-7), 2024-09-27
Supplement: 41467_2024_52231_MOESM6_ESM.pdf [file 41467_2024_52231_MOESM6_ESM.pdf]

## Reporting Summary

Nature Portfolio wishes to improve the reproducibility of the work that we publish. This form provides structure for consistency and transparency in reporting. For further information on Nature Portfolio policies, see our [Editorial Policies](#) and the [Editorial Policy Checklist](#).

### Statistics

For all statistical analyses, confirm that the following items are present in the figure legend, table legend, main text, or Methods section.

- |                                     |                                                                                                                                                                                                                                                                                                |
|-------------------------------------|------------------------------------------------------------------------------------------------------------------------------------------------------------------------------------------------------------------------------------------------------------------------------------------------|
| n/a                                 | Confirmed                                                                                                                                                                                                                                                                                      |
| <input type="checkbox"/>            | <input checked="" type="checkbox"/> The exact sample size ( $n$ ) for each experimental group/condition, given as a discrete number and unit of measurement                                                                                                                                    |
| <input type="checkbox"/>            | <input checked="" type="checkbox"/> A statement on whether measurements were taken from distinct samples or whether the same sample was measured repeatedly                                                                                                                                    |
| <input type="checkbox"/>            | <input checked="" type="checkbox"/> The statistical test(s) used AND whether they are one- or two-sided<br><i>Only common tests should be described solely by name; describe more complex techniques in the Methods section.</i>                                                               |
| <input checked="" type="checkbox"/> | <input type="checkbox"/> A description of all covariates tested                                                                                                                                                                                                                                |
| <input type="checkbox"/>            | <input checked="" type="checkbox"/> A description of any assumptions or corrections, such as tests of normality and adjustment for multiple comparisons                                                                                                                                        |
| <input type="checkbox"/>            | <input checked="" type="checkbox"/> A full description of the statistical parameters including central tendency (e.g. means) or other basic estimates (e.g. regression coefficient) AND variation (e.g. standard deviation) or associated estimates of uncertainty (e.g. confidence intervals) |
| <input type="checkbox"/>            | <input checked="" type="checkbox"/> For null hypothesis testing, the test statistic (e.g. $F$ , $t$ , $r$ ) with confidence intervals, effect sizes, degrees of freedom and $P$ value noted<br><i>Give <math>P</math> values as exact values whenever suitable.</i>                            |
| <input checked="" type="checkbox"/> | <input type="checkbox"/> For Bayesian analysis, information on the choice of priors and Markov chain Monte Carlo settings                                                                                                                                                                      |
| <input checked="" type="checkbox"/> | <input type="checkbox"/> For hierarchical and complex designs, identification of the appropriate level for tests and full reporting of outcomes                                                                                                                                                |
| <input type="checkbox"/>            | <input checked="" type="checkbox"/> Estimates of effect sizes (e.g. Cohen's $d$ , Pearson's $r$ ), indicating how they were calculated                                                                                                                                                         |

*Our web collection on [statistics for biologists](#) contains articles on many of the points above.*

### Software and code

Policy information about [availability of computer code](#)

|                 |                                                                                                                                                                                                                                                                                                                                                                                                                                                                                                                                                                                                                                                                                                                                                                                                                                                                                                                                                                                                                                                                                                                                                                                                                                                                                                                                           |
|-----------------|-------------------------------------------------------------------------------------------------------------------------------------------------------------------------------------------------------------------------------------------------------------------------------------------------------------------------------------------------------------------------------------------------------------------------------------------------------------------------------------------------------------------------------------------------------------------------------------------------------------------------------------------------------------------------------------------------------------------------------------------------------------------------------------------------------------------------------------------------------------------------------------------------------------------------------------------------------------------------------------------------------------------------------------------------------------------------------------------------------------------------------------------------------------------------------------------------------------------------------------------------------------------------------------------------------------------------------------------|
| Data collection | No commercial, open source, or custom code was used to collect data. Data was downloaded directly from sources: UNK iCLIP-seq data was obtained from E-MTAB-2279; RNA-seq data from ENCODE (see Data Availability for accession numbers); eCLIP data from ENCODE (see Data Availability for accession numbers); RiboSeq data was obtained directly from Jernej Murn (Shah et al. 2024).                                                                                                                                                                                                                                                                                                                                                                                                                                                                                                                                                                                                                                                                                                                                                                                                                                                                                                                                                   |
| Data analysis   | Open source software and packages as well as custom code were utilized for data analysis. All custom code available on request. RStudio (version 2023.03.0) with R platform (version 4.2.2) was used for primary data analysis. RStudio packages were used as needed: AnnotationHub (version 3.8.0), ape (version 5.7), BSgenome.Hsapiens.NCBI.GRCh38 (version 1.3.1), BSgenome.Hsapiens.UCSC.hg38 (version 1.4.5), BSgenome.Mmusculus.UCSC.mm10 (version 1.4.3), cowplot (version 1.1.1) data.table (version 1.14.8), DESeq2 (version 1.40.1), dplyr (version 1.1.0), flextable (version 0.9.6), ggmsa (version 1.3.4), ggprism (version 1.0.4), ggplot2 (version 3.4.1), ggpattern (version 1.0.1), ggpubr (version 0.6.0), ggrepel (version 0.9.3), Hmisc (version 4.8.0), liftOver (version 1.24.0), lsr (version 0.5.2), magick (version 2.8.3), msa (version 1.30.1), org.Hs.eg.db (version 3.17.0), reshape2 (version 1.4.4), rstatix (version 0.7.2), scales (version 1.2.1), stringr (version 1.4.4), and VennDiagram (version 1.7.3). BEDtools (version 2.31.0), fastx_toolkit (version 0.0.14), GraphPad Prism (version 10), PHAST (version 1.5), RSEM (version 1.3.1), SAMtools (version 1.16), seqtk (version 2.3.0), STAR (version 2.7.10b), and Vienna RNAfold (version 2.5.1) were also used for data analysis as needed. |

For manuscripts utilizing custom algorithms or software that are central to the research but not yet described in published literature, software must be made available to editors and reviewers. We strongly encourage code deposition in a community repository (e.g. GitHub). See the Nature Portfolio [guidelines for submitting code & software](#) for further information.

## Data

Policy information about [availability of data](#)

All manuscripts must include a [data availability statement](#). This statement should provide the following information, where applicable:

- Accession codes, unique identifiers, or web links for publicly available datasets
- A description of any restrictions on data availability
- For clinical datasets or third party data, please ensure that the statement adheres to our [policy](#)

Final enrichments and fastqs for the nsRBNS and 100vertRBNS datasets as well as fastqs for the RBNS detailed here have been deposited in Gene Expression Omnibus (GSE262560).

## Research involving human participants, their data, or biological material

Policy information about studies with [human participants or human data](#). See also policy information about [sex, gender \(identity/presentation\), and sexual orientation](#) and [race, ethnicity and racism](#).

|                                                                    |                                                                              |
|--------------------------------------------------------------------|------------------------------------------------------------------------------|
| Reporting on sex and gender                                        | No human participants, data, or biological material were used in this study. |
| Reporting on race, ethnicity, or other socially relevant groupings | No human participants, data, or biological material were used in this study. |
| Population characteristics                                         | No human participants, data, or biological material were used in this study. |
| Recruitment                                                        | No human participants, data, or biological material were used in this study. |
| Ethics oversight                                                   | No human participants, data, or biological material were used in this study. |

Note that full information on the approval of the study protocol must also be provided in the manuscript.

## Field-specific reporting

Please select the one below that is the best fit for your research. If you are not sure, read the appropriate sections before making your selection.

- Life sciences       Behavioural & social sciences       Ecological, evolutionary & environmental sciences

For a reference copy of the document with all sections, see [nature.com/documents/nr-reporting-summary-flat.pdf](https://www.nature.com/documents/nr-reporting-summary-flat.pdf)

## Life sciences study design

All studies must disclose on these points even when the disclosure is negative.

|                 |                                                                                                                                                                                                                                                                                                                                                                                                                                                                                                                                                                                   |
|-----------------|-----------------------------------------------------------------------------------------------------------------------------------------------------------------------------------------------------------------------------------------------------------------------------------------------------------------------------------------------------------------------------------------------------------------------------------------------------------------------------------------------------------------------------------------------------------------------------------|
| Sample size     | For large-scale natural sequence-based sequencing data, a sample size of two was utilized due to experimental cost. Low variability was observed (Pearson's correlation values reported throughout manuscript). For random sequence-based sequencing data, a sample size of one was used and validated via previously reported structural data. For in vitro binding validation, a sample size of three was used when little variance was expected (fluorescence polarization) whereas a sample size of five was used in experiments with high variance (qPCR binding assay).     |
| Data exclusions | No data were excluded from the given study.                                                                                                                                                                                                                                                                                                                                                                                                                                                                                                                                       |
| Replication     | Large-scale sequencing experiments were performed in binding duplicate (full binding assays), with independent protein preparations. Pearson's correlation values reported throughout manuscript for replicate sequencing samples. Fluorescence polarization validation was performed in binding triplicate (full binding assays) with independent protein preparations. qPCR binding assay validation was performed in quintuplicate (full binding assays) with three independent protein preparations: technical duplicates for qPCR were performed due to qPCR-based variance. |
| Randomization   | Randomization was not used in this study. For data selection, top-ranked data was included rather than randomized.                                                                                                                                                                                                                                                                                                                                                                                                                                                                |
| Blinding        | Blinding not relevant to given study as study consists primarily of large-scale sequencing data.                                                                                                                                                                                                                                                                                                                                                                                                                                                                                  |

## Reporting for specific materials, systems and methods

We require information from authors about some types of materials, experimental systems and methods used in many studies. Here, indicate whether each material, system or method listed is relevant to your study. If you are not sure if a list item applies to your research, read the appropriate section before selecting a response.

## Materials & experimental systems

| n/a                                 | Involvement in the study                               |
|-------------------------------------|--------------------------------------------------------|
| <input checked="" type="checkbox"/> | <input type="checkbox"/> Antibodies                    |
| <input checked="" type="checkbox"/> | <input type="checkbox"/> Eukaryotic cell lines         |
| <input checked="" type="checkbox"/> | <input type="checkbox"/> Palaeontology and archaeology |
| <input checked="" type="checkbox"/> | <input type="checkbox"/> Animals and other organisms   |
| <input checked="" type="checkbox"/> | <input type="checkbox"/> Clinical data                 |
| <input checked="" type="checkbox"/> | <input type="checkbox"/> Dual use research of concern  |
| <input checked="" type="checkbox"/> | <input type="checkbox"/> Plants                        |

## Methods

| n/a                                 | Involvement in the study                        |
|-------------------------------------|-------------------------------------------------|
| <input checked="" type="checkbox"/> | <input type="checkbox"/> ChIP-seq               |
| <input checked="" type="checkbox"/> | <input type="checkbox"/> Flow cytometry         |
| <input checked="" type="checkbox"/> | <input type="checkbox"/> MRI-based neuroimaging |

## Plants

Seed stocks

No plants or plant-based materials were used in this study.

Novel plant genotypes

No plants or plant-based materials were used in this study.

Authentication

No plants or plant-based materials were used in this study.
